# Supplementary material for: The Effects of Hsp90α1 Mutations on Myosin Thick Filament Organization
Source: PubMed Central journal article supplement (PMC4642942; doi:10.1371/journal.pone.0142573), 2015-11-12
Supplement: pone.0142573.s001.pdf [file pone.0142573.s001.pdf]

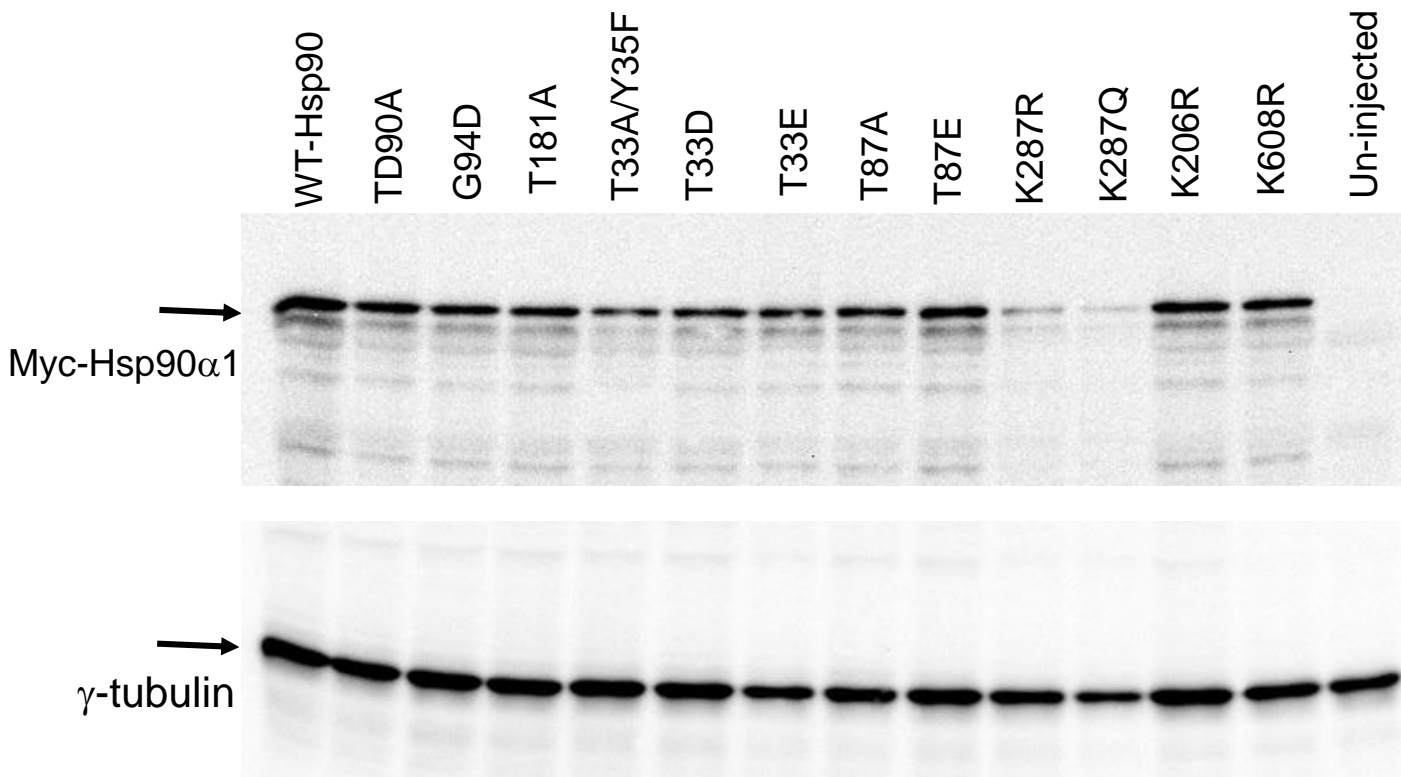

**S1 Figure.** Western blot analysis showing the expression of myc-tagged wild type and mutant Hsp90α1 proteins in zebrafish embryos co-injected with Hsp90α1 ATG-MO. Expression of the myc-tagged proteins was analyzed by Western blot using anti-myc tag antibody (9E10). Each lane contains protein extract from 10 embryos.  $\gamma$ -tubulin was used as a loading control.
