# Supplementary material for: The Effects of Hsp90α1 Mutations on Myosin Thick Filament Organization
Source: PubMed Central journal article supplement (PMC4642942; doi:10.1371/journal.pone.0142573), 2015-11-12
Supplement: pone.0142573.s002.pdf [file pone.0142573.s002.pdf]

## Supporting information

**S1 Table. List of PCR primers used in mutagenesis**

| Site mutation | Mutation primer sequence                                                             |
|---------------|--------------------------------------------------------------------------------------|
| T33A/Y35F     | P1: CTCTGATCATCAACGCCTTCTTCTCCAACAAGGAGA<br>P2: TCTCCTTGTTGGAGAAGAAGGCGTTGATGATCAGAG |
| T33D          | P1: CTCTGATCATCAACGACTTCTACTCCAACAAG<br>P2: CTTGTTGGAGTAGAAGTCGTTGATGATCAGAG         |
| T33E          | P1: CTCTGATCATCAACGAGTTCTACTCCAACAAG<br>P2: CTTGTTGGAGTAGAACTCGTTGATGATCAGAG         |
| T87A          | P1: AAGAGCGCACGCTGGCCATCATCGACACC<br>P2: GGTGTCGATGATGGCCAGCGTGCGCTCTT               |
| T87E          | P1: AAGAGCGCACGCTGGAGATCATCGACACCGG<br>P2: CCGGTGTCGATGATCTCCAGCGTGCGCTCTT           |
| D90A          | P1: CGCTGACCATCATCGCCACCGGCATCGGCAT<br>P2: ATGCCGATGCCGGTGGCGATGATGGTCAGCG           |
| G94D          | P1: TCGACACCGGCATCGACATGACCAAAGCTGA<br>P2: TCAGCTTTGGTCATGTCGATGCCGGTGTCTGA          |
| T181A         | P1: ATCAATTGGACGTGGTGCCAAAGTCATTCTCCAC<br>P2: GTGGAGAATGACTTTGGCACCACGTCCAATTGAT     |
| K206R         | P1: GGAAGTGGTGAAGAGGCACTCTCAGTT<br>P2: AACTGAGAGTGCCTCTTCACCACTTCC                   |
| K287R         | P1: GCTGAATAAGACCAGGCCGATCTGGACC<br>P2: GGTCCAGATCGGCCTGGTCTTATTCAGC                 |
| K287Q         | P1: GCTGAATAAGACCCAGCCGATCTGGACC<br>P2: GGTCCAGATCGGCTGGGTCTTATTCAGC                 |
| K608R         | P1: GGAGAGGATCATGAGGTCTCAGGCTCT<br>P2: AGAGCCTGAGACCTCATGATCCTCTCC                   |
